# Supplementary material for: Opportunistic Infections and Efficacy Following Conversion to Belatacept-Based Therapy after Kidney Transplantation: A French Multicenter Cohort
Source: PubMed Central journal article supplement (PMC7693007; doi:10.3390/jcm9113479), 2020-10-28
Supplement: jcm-09-03479-s001.pdf [file jcm-09-03479-s001.pdf]

**Table S1.** Comparison of data of patients from initial cohort (from Bertrand et al.) and pooled monocentric cohort.

| Characteristics                                      | Monocentric cohort<br>(N=173) | Bertrand <i>et al.</i> cohort<br>(N =280) | p-value          |
|------------------------------------------------------|-------------------------------|-------------------------------------------|------------------|
| <b>Recipients' characteristics</b>                   |                               |                                           |                  |
| Age at transplantation - <i>years</i>                | 50.3 ± 16                     | 53.9 ± 15                                 | <b>0.026</b>     |
| Age at conversion - <i>years</i>                     | 56.9 ± 14                     | 56.6 ± 15                                 | 0.780            |
| Gender: male <i>n (%)</i>                            | 116 (67)                      | 169 (60.3)                                | 0.180            |
| CMV R+ <i>n (%)</i>                                  | 78 (56.1)                     | 165 (58.9)                                | 0.180            |
| First transplantation <i>n (%)</i>                   | 128 (73.9)                    | 236 (84.3)                                | <b>0.010</b>     |
| <b>Donors' characteristics</b>                       |                               |                                           |                  |
| Donation after death <i>n (%)</i>                    | 123 (77.3)                    | 260 (92.8)                                | <b>&lt;0.001</b> |
| Living donor <i>n (%)</i>                            | 36 (22.6)                     | 19 (6.7)                                  | <b>&lt;0.001</b> |
| <b>Characteristics at conversion</b>                 |                               |                                           |                  |
| Time between KT and belatacept conversion – months   | 78.7 ± 81                     | 31.9 ± 15                                 | <b>&lt;0.001</b> |
| eGFR at conversion – MDRD-mL/min/1.73 m <sup>2</sup> | 40.7 ± 9                      | 26.6 ± 15                                 | <b>&lt;0.001</b> |
| Diabetes at conversion <i>n (%)</i>                  | 44 (25.4)                     | 89 (31.8)                                 | 0.180            |
| Lymphopenia at conversion <i>n (%)</i>               | 80 (46.2)                     | 216 (77)                                  | <b>&lt;0.001</b> |
| <b>Immunosuppression</b>                             |                               |                                           |                  |
| Induction therapy                                    |                               |                                           |                  |
| Antithymoglobulin <i>n (%)</i>                       | 154 (89)                      | 100 (36.4)                                | <b>&lt;0.001</b> |
| Basiliximab <i>n (%)</i>                             | 2 (1.1)                       | 173 (62.9)                                | <b>&lt;0.001</b> |
| Maintenance therapy at conversion                    |                               |                                           |                  |
| Steroids <i>n (%)</i>                                | 35 (20.2)                     | 241 (87.8)                                | <b>&lt;0.001</b> |
| Tacrolimus <i>n (%)</i>                              | 162 (93.6)                    | 201 (71.8)                                | <b>&lt;0.001</b> |
| Tacrolimus trough concentration – ng/mL              | 6.5 ± 3                       | 6.5 ± 2                                   | 0.911            |
| Cyclosporine <i>n (%)</i>                            | 9 (5.2)                       | 68 (24.3)                                 | <b>&lt;0.001</b> |
| Mycophenolate <i>n (%)</i>                           | 150 (86.7)                    | 246 (87.8)                                | 0.754            |
| mTOR inhibitors <i>n (%)</i>                         | 15 (8.6)                      | 29 (10.3)                                 | 0.660            |
| Azathioprine <i>n (%)</i>                            | 8 (4.6)                       | 12 (6.4)                                  | 0.660            |

Results are expressed according to either mean ± SD or *N (%)*. Missing data are not taken into account for the calculation of percentages. eGFR, estimated glomerular filtration rate; KT, kidney transplantation; mTOR, mammalian target of rapamycin; CMV, cytomegalovirus; D, donor; R, recipient.

**Table S2.** OPI description in patients who developed two OPI during the follow-up.

|           | OPI 1               | OPI 2            |
|-----------|---------------------|------------------|
| Patient 1 | CMV Chorioretinitis | Pneumocystis     |
| Patient 2 | CMV Colitis         | Pneumocystis     |
| Patient 3 | Pneumocystis        | CMV pneumonitis  |
| Patient 4 | Pneumocystis        | CMV pneumonitis  |
| Patient 5 | Pneumocystis        | CMV pneumonitis  |
| Patient 6 | Multivisceral CMV   | Pneumocystis     |
| Patient 7 | CMV Pneumonitis     | Brain Toxoplasma |
| Patient 8 | Pneumocystis        | EBV induced PTLD |

CMV: Cytomegalovirus. PTLD: Post-transplant lymphoproliferative disease.
